# Supplementary material
Source: HighWire-hosted journal article supplement (https://www.cmajopen.ca/highwire/filestream/81199/field_highwire_adjunct_files/0/2017-0126-1-at.pdf)
Supplement: 2017-0126-1-at.pdf [file 2017-0126-1-at.pdf]

**Appendix 1 (as supplied by the authors): Search Strategy (EMBASE 1974 to 2016 February 12)**

| # | Searches                                                                                                                                                                                       | Results |
|---|------------------------------------------------------------------------------------------------------------------------------------------------------------------------------------------------|---------|
| 1 | exp infection/                                                                                                                                                                                 | 2830011 |
| 2 | exp communicable disease/                                                                                                                                                                      | 18419   |
| 3 | 1 or 2                                                                                                                                                                                         | 2830011 |
| 4 | exp health care personnel/or exp physician/or (physician* or doctor or doctors).mp.                                                                                                            | 1445557 |
| 5 | Exp clothing/ or (attire or necktie* or neck tie*).mp. (mp=title, abstract, heading word, drug trade name, original title, device manufacturer, drug manufacturer, device trade name, keyword] | 31434   |
| 6 | (infect* or communicable*).mp. or 3 [mp=title, abstract, heading word, drug trade name, original title, device manufacturer, drug manufacturer, device trade name, keyword]                    | 3356781 |
| 7 | 4 and 5 and 6                                                                                                                                                                                  | 1817    |
| 8 | Limit 7 to yr="2014 – current"                                                                                                                                                                 | 259     |
| 9 | Limit 8 to (human and English language)                                                                                                                                                        | 254     |
